# Supplementary material
Source: publisher figshare collection journal article supplement (https://sage.figshare.com/ndownloader/files/17059397)
Supplement: Supplementary file 1 [file 17059397]

| Political Parties |                                   |                                                                                                                                                                                                                                                                                                                                    |                        |
|-------------------|-----------------------------------|------------------------------------------------------------------------------------------------------------------------------------------------------------------------------------------------------------------------------------------------------------------------------------------------------------------------------------|------------------------|
| Abbreviation      | Full Name                         | Foundation                                                                                                                                                                                                                                                                                                                         |                        |
| ANEL*             | The Independent Greeks            | 24 February 2012                                                                                                                                                                                                                                                                                                                   |                        |
| DIMAR             | Democratic Left                   | 27 June 2010                                                                                                                                                                                                                                                                                                                       | 3<br>20                |
| GD                | Golden Dawn                       | 1 January 1980                                                                                                                                                                                                                                                                                                                     |                        |
| KKE               | Greek Communist Party             | 17 November 1918                                                                                                                                                                                                                                                                                                                   |                        |
| LAOS              | Popular Orthodox Rally            | 14 September 2004                                                                                                                                                                                                                                                                                                                  |                        |
| NEEL              | Agreement for the New<br>Greece   | 15 April 2013                                                                                                                                                                                                                                                                                                                      |                        |
| ND                | New Democracy                     | 4 October 1974                                                                                                                                                                                                                                                                                                                     | 3<br>5 July 2<br>24 No |
| OP                | Ecologists Greens                 | 8 December 2002                                                                                                                                                                                                                                                                                                                    |                        |
| PASOK             | Panhellenic Socialist<br>Movement | 3 September 1974                                                                                                                                                                                                                                                                                                                   | 8 Fe<br>18             |
| (To) Potami*      | The River                         | 26 February 2014                                                                                                                                                                                                                                                                                                                   |                        |
| SYRIZA*           | Coalition of the Radical<br>Left  | The party formed in 1991 as SYNASPISMOS (Coalition of the Left, of Movements and Ecology). In 2004 SYNASPISMOS formed an alliance with several smaller parties. The new alliance was called SYRIZA (Coalition of the radical left). The alliance dissolved on July 10,2013 and merged into one party under the same name (SYRIZA). |                        |

\* For the genesis and institutionalisation of these three parties, see Lefkofridi and Weissenbach, 2019
